# Supplementary material
Source: Royal Society of Chemistry journal article supplement (doi:10.1039/d6ob00750c)
Supplement: d6ob00750c2.pdf [file d6ob00750c2.pdf]

## Supplementary Information II

### Synthesis, characterization, and impact of carbon spacer on geometry and antibacterial activity of a new series of 1,n-bis(5-cycloalkylsulfenyl-1,3,4-thiadiazole-2-sulfenyl) alkanes (n = 4 and 6)

Syarifah Iliya Nor Za'im<sup>a</sup>, Mamduhah Mohamad<sup>a</sup>, Hayedeh Gorjian<sup>b</sup>, Mohd Rafie Johan<sup>a</sup>, Nader Ghaffari Khaligh<sup>a,\*</sup>

<sup>a</sup> Nanotechnology and Catalysis Research Center, Institute for Advanced Studies (IAS), Universiti Malaya, 50603, Kuala Lumpur, Malaysia

<sup>b</sup> Agricultural Engineering Research Department, Fars Agricultural and Natural Resources Research and Education Center, Shiraz, Iran

\* Corresponding author E-mail: [ngkhaligh@gmail.com](mailto:ngkhaligh@gmail.com) and also [ngkhaligh@um.edu.my](mailto:ngkhaligh@um.edu.my)

**Figure S1.** The Oak Ridge thermal ellipsoid plot (ORTEP) diagrams of C5C6TD at a thermal value of 30 °C and a symmetry code of 1-x,2-y,-z.

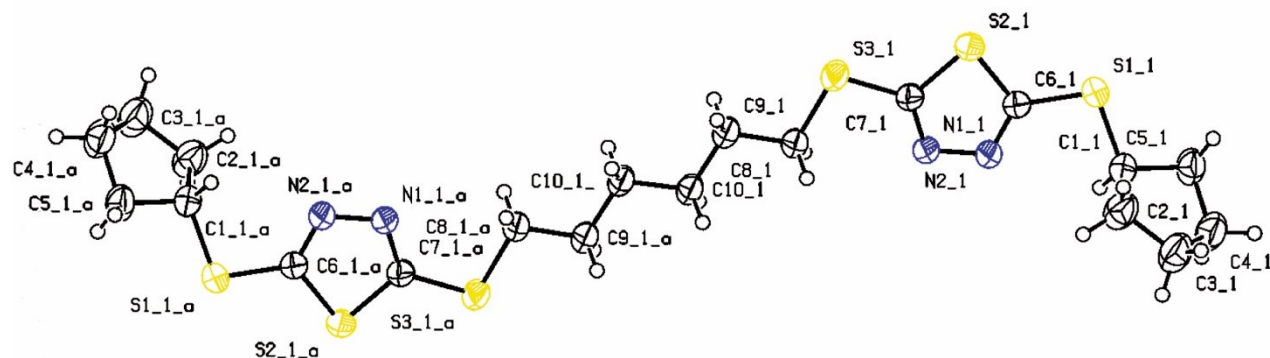

**Figure S2a.** The conformation and space direction of the carbon spacer, cyclopentyl, and TD rings regarding the face plane (010).

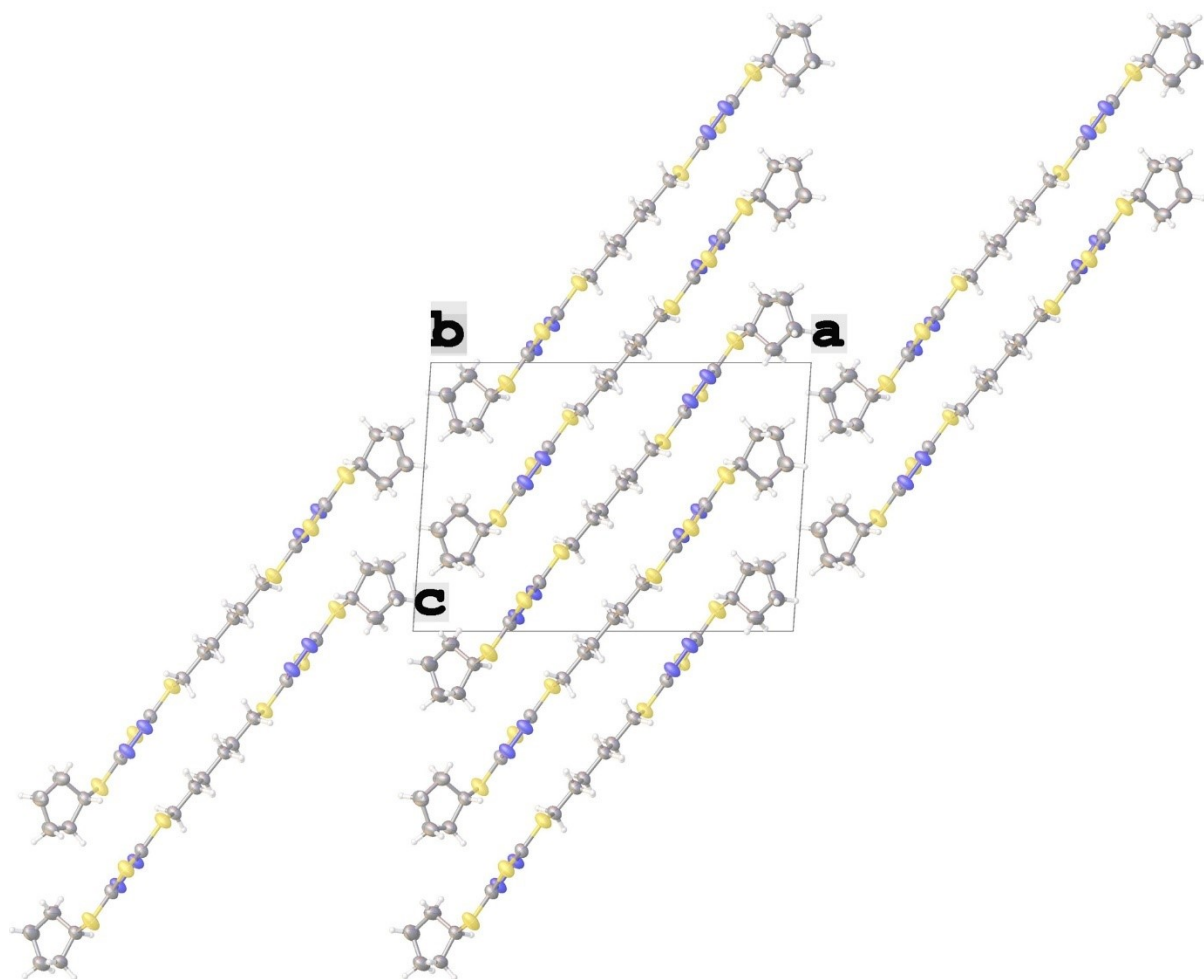

**Figure S2b.** The conformation and space direction of the carbon spacer and cyclopentyl, and TD rings regarding the diagonal plane of (011).

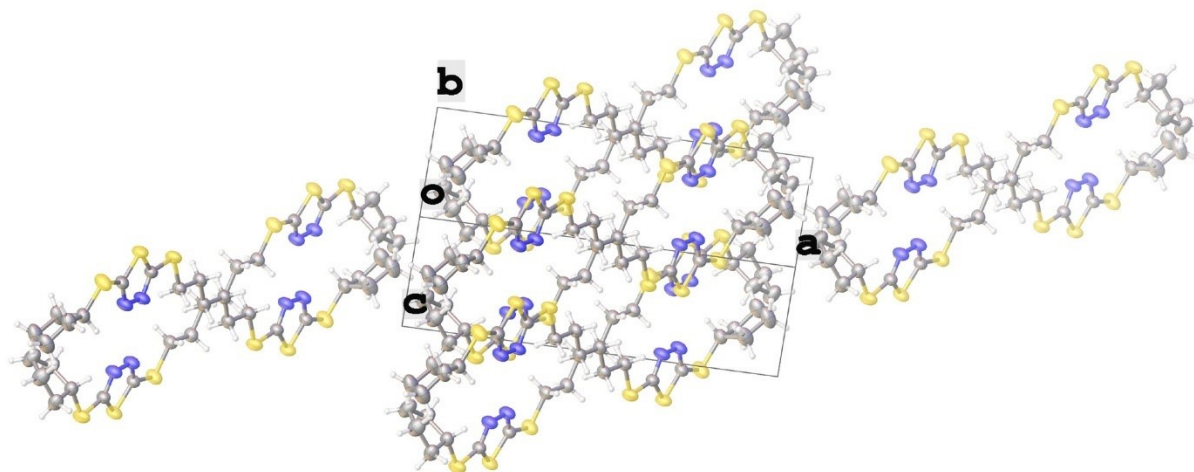

**Table 1.** Crystal data and structure refinement of 1,6-bis(2-cyclopentylsulfenyl-1,3,4-thiadiazole-5-sulfenyl) hexane.

|                                             |                                                                |
|---------------------------------------------|----------------------------------------------------------------|
| Identification code                         | exp192_a                                                       |
| Empirical formula                           | C <sub>10</sub> H <sub>15</sub> N <sub>2</sub> S <sub>3</sub>  |
| Formula weight                              | 259.42                                                         |
| Temperature/K                               | 303(2)                                                         |
| Crystal system                              | monoclinic                                                     |
| Space group                                 | P2 <sub>1</sub> /c                                             |
| a/Å                                         | 17.644(6)                                                      |
| b/Å                                         | 5.6480(18)                                                     |
| c/Å                                         | 12.488(4)                                                      |
| $\alpha$ /°                                 | 90                                                             |
| $\beta$ /°                                  | 93.834(12)                                                     |
| $\gamma$ /°                                 | 90                                                             |
| Volume/Å <sup>3</sup>                       | 1241.7(7)                                                      |
| Z                                           | 4                                                              |
| $\rho_{\text{calc}}$ /cm <sup>3</sup>       | 1.388                                                          |
| $\mu$ /mm <sup>-1</sup>                     | 0.567                                                          |
| F(000)                                      | 548.0                                                          |
| Crystal size/mm <sup>3</sup>                | 0.52 × 0.39 × 0.05                                             |
| Radiation                                   | MoK $\alpha$ ( $\lambda$ = 0.71073)                            |
| 2 $\Theta$ range for data collection/°      | 6.54 to 55.158                                                 |
| Index ranges                                | -22 ≤ h ≤ 22, -7 ≤ k ≤ 7, -16 ≤ l ≤ 14                         |
| Reflections collected                       | 35642                                                          |
| Independent reflections                     | 2867 [ $R_{\text{int}}$ = 0.0570, $R_{\text{sigma}}$ = 0.0265] |
| Data/restraints/parameters                  | 2867/0/137                                                     |
| Goodness-of-fit on F <sup>2</sup>           | 1.037                                                          |
| Final R indexes [ $I \geq 2\sigma(I)$ ]     | $R_1 = 0.0347$ , $wR_2 = 0.0850$                               |
| Final R indexes [all data]                  | $R_1 = 0.0431$ , $wR_2 = 0.0913$                               |
| Largest diff. peak/hole / e Å <sup>-3</sup> | 0.30/-0.32                                                     |

**Table 2.** Fractional Atomic Coordinates ( $\times 10^4$ ) and Equivalent Isotropic Displacement Parameters ( $\text{\AA}^2 \times 10^3$ ) of 1,6-bis(2-cyclopentylsulfenyl-1,3,4-thiadiazole-5-sulfenyl) hexane.  $U_{\text{eq}}$  is defined as 1/3 of the trace of the orthogonalised  $U_{ij}$  tensor.

| Atom  | <i>x</i>   | <i>y</i>  | <i>z</i>   | $U(\text{eq})$ |
|-------|------------|-----------|------------|----------------|
| S1_1  | 7965.0(3)  | 6122.5(9) | 4200.3(5)  | 63.86(18)      |
| S2_1  | 7130.0(3)  | 7340.5(7) | 6151.5(4)  | 54.03(16)      |
| S3_1  | 6238.1(3)  | 5462.0(8) | 7950.5(4)  | 53.71(15)      |
| N1_1  | 6887.4(9)  | 2936(2)   | 6431.3(12) | 49.2(4)        |
| N2_1  | 7307.5(9)  | 3083(3)   | 5531.5(12) | 51.0(4)        |
| C1_1  | 8346.7(10) | 3334(3)   | 3775.5(14) | 47.0(4)        |
| C2_1  | 8986.7(12) | 2323(5)   | 4506.1(16) | 67.3(6)        |
| C3_1  | 9503.2(13) | 1055(5)   | 3772.1(18) | 75.6(7)        |
| C4_1  | 9187.5(13) | 1504(5)   | 2631.8(16) | 69.8(6)        |
| C5_1  | 8693.9(11) | 3659(4)   | 2694.5(14) | 57.1(5)        |
| C6_1  | 7470.6(9)  | 5239(3)   | 5298.8(14) | 44.0(4)        |
| C7_1  | 6757.7(9)  | 4989(3)   | 6833.3(14) | 41.6(4)        |
| C8_1  | 5957.9(10) | 2460(3)   | 8238.4(14) | 45.0(4)        |
| C9_1  | 5454.3(10) | 2502(3)   | 9184.8(14) | 47.2(4)        |
| C10_1 | 5249.1(9)  | 21(3)     | 9525.0(13) | 44.8(4)        |

**Table 3.** Anisotropic Displacement Parameters ( $\text{\AA}^2 \times 10^3$ ) of 1,6-bis(2-cyclopentylsulfenyl-1,3,4-thiadiazole-5-sulfenyl) hexane. The Anisotropic displacement factor exponent takes the form:  $-2\pi^2[h^2a^*2U_{11}+2hka^*b^*U_{12}+\dots]$ .

| Atom  | $U_{11}$ | $U_{22}$ | $U_{33}$ | $U_{23}$   | $U_{13}$ | $U_{12}$  |
|-------|----------|----------|----------|------------|----------|-----------|
| S1_1  | 75.7(3)  | 46.1(3)  | 74.4(3)  | 15.6(2)    | 40.2(3)  | 7.7(2)    |
| S2_1  | 66.1(3)  | 30.7(2)  | 68.3(3)  | -4.81(18)  | 26.7(2)  | -5.40(18) |
| S3_1  | 66.5(3)  | 41.2(2)  | 56.5(3)  | -11.41(19) | 27.4(2)  | -4.5(2)   |
| N1_1  | 66.2(9)  | 32.9(7)  | 51.5(8)  | -1.5(6)    | 26.4(7)  | 0.6(6)    |
| N2_1  | 67.3(9)  | 35.9(7)  | 53.2(8)  | 0.1(6)     | 28.3(7)  | 2.4(7)    |
| C1_1  | 45.9(9)  | 50.3(9)  | 45.9(9)  | 2.8(7)     | 12.6(7)  | 3.1(8)    |
| C2_1  | 72.5(13) | 84.8(16) | 44.8(10) | 2.1(10)    | 5.4(9)   | 24.5(12)  |
| C3_1  | 67.1(13) | 99.6(19) | 61.4(12) | 11.0(12)   | 14.8(10) | 31.5(13)  |
| C4_1  | 72.4(13) | 87.1(16) | 52.1(11) | 2.1(11)    | 20.1(10) | 18.9(12)  |
| C5_1  | 53.8(10) | 75.6(13) | 42.9(9)  | 8.4(9)     | 10.4(8)  | 8.0(9)    |
| C6_1  | 46.2(9)  | 36.0(8)  | 51.3(9)  | 2.3(7)     | 14.1(7)  | 2.5(7)    |
| C7_1  | 44.6(8)  | 34.2(8)  | 47.2(9)  | -2.5(6)    | 11.1(7)  | -1.0(6)   |
| C8_1  | 50.1(9)  | 41.5(8)  | 45.2(9)  | -1.9(7)    | 15.1(7)  | -0.5(7)   |
| C9_1  | 47.8(9)  | 48.5(9)  | 46.8(9)  | -4.0(7)    | 15.3(7)  | 2.0(7)    |
| C10_1 | 45.2(9)  | 48.3(9)  | 42.2(9)  | -4.7(7)    | 12.9(7)  | 2.1(7)    |

**Table 4.** Geometric parameters of 1,6-bis(2-cyclopentylsulfenyl-1,3,4-thiadiazole-5-sulfenyl) hexane.

| Bond length    |                    |                    |            |             |
|----------------|--------------------|--------------------|------------|-------------|
| Atom           | Atom               | Length/Å           |            |             |
| S1_1           | C1_1               | 1.8066(19)         |            |             |
| S1_1           | C6_1               | 1.7470(17)         |            |             |
| S2_1           | C6_1               | 1.7289(17)         |            |             |
| S2_1           | C7_1               | 1.7307(17)         |            |             |
| S3_1           | C7_1               | 1.7406(17)         |            |             |
| S3_1           | C8_1               | 1.8091(18)         |            |             |
| N1_1           | N2_1               | 1.389(2)           |            |             |
| N1_1           | C7_1               | 1.290(2)           |            |             |
| N2_1           | C6_1               | 1.289(2)           |            |             |
| C1_1           | C2_1               | 1.515(3)           |            |             |
| C1_1           | C5_1               | 1.530(2)           |            |             |
| C2_1           | C3_1               | 1.515(3)           |            |             |
| C3_1           | C4_1               | 1.515(3)           |            |             |
| C4_1           | C5_1               | 1.502(3)           |            |             |
| C8_1           | C9_1               | 1.526(2)           |            |             |
| C9_1           | C10_1              | 1.515(2)           |            |             |
| C10_1          | C10_1 <sup>1</sup> | 1.523(3)           |            |             |
| Bond Angles    |                    |                    |            |             |
| Atom           | Atom               | Atom               | Angle/°    |             |
| C6_1           | S1_1               | C1_1               | 101.37(8)  |             |
| C6_1           | S2_1               | C7_1               | 86.28(8)   |             |
| C7_1           | S3_1               | C8_1               | 100.43(8)  |             |
| C7_1           | N1_1               | N2_1               | 112.27(13) |             |
| C6_1           | N2_1               | N1_1               | 112.23(14) |             |
| C2_1           | C1_1               | S1_1               | 115.41(14) |             |
| C2_1           | C1_1               | C5_1               | 104.49(15) |             |
| C5_1           | C1_1               | S1_1               | 109.47(13) |             |
| C3_1           | C2_1               | C1_1               | 105.55(16) |             |
| C2_1           | C3_1               | C4_1               | 106.94(17) |             |
| C5_1           | C4_1               | C3_1               | 105.34(18) |             |
| C4_1           | C5_1               | C1_1               | 102.49(16) |             |
| S2_1           | C6_1               | S1_1               | 120.00(10) |             |
| N2_1           | C6_1               | S1_1               | 125.28(13) |             |
| N2_1           | C6_1               | S2_1               | 114.68(13) |             |
| S2_1           | C7_1               | S3_1               | 120.94(9)  |             |
| N1_1           | C7_1               | S2_1               | 114.54(12) |             |
| N1_1           | C7_1               | S3_1               | 124.51(12) |             |
| C9_1           | C8_1               | S3_1               | 108.68(12) |             |
| C10_1          | C9_1               | C8_1               | 111.42(14) |             |
| C9_1           | C10_1              | C10_1 <sup>1</sup> | 113.21(17) |             |
| Torsion Angles |                    |                    |            |             |
| Atom           | Atom               | Atom               | Atom       | Angle/°     |
| S1_1           | C1_1               | C2_1               | C3_1       | 162.67(15)  |
| S1_1           | C1_1               | C5_1               | C4_1       | -146.52(17) |
| S3_1           | C8_1               | C9_1               | C10_1      | -175.54(12) |
| N1_1           | N2_1               | C6_1               | S1_1       | -177.91(13) |
| N1_1           | N2_1               | C6_1               | S2_1       | 0.0(2)      |
| N2_1           | N1_1               | C7_1               | S2_1       | 0.4(2)      |
| N2_1           | N1_1               | C7_1               | S3_1       | 179.08(13)  |
| C1_1           | S1_1               | C6_1               | S2_1       | 168.69(11)  |
| C1_1           | S1_1               | C6_1               | N2_1       | -13.51(19)  |
| C1_1           | C2_1               | C3_1               | C4_1       | -35.9(2)    |
| C2_1           | C1_1               | C5_1               | C4_1       | -26.3(2)    |
| C2_1           | C3_1               | C4_1               | C5_1       | 20.1(3)     |
| C3_1           | C4_1               | C5_1               | C1_1       | 4.1(3)      |
| C5_1           | C1_1               | C2_1               | C3_1       | 38.5(2)     |
| C6_1           | S1_1               | C1_1               | C2_1       | 170.51(13)  |

| Atom | Atom | Atom  | Atom               | Angle/°     |
|------|------|-------|--------------------|-------------|
| C6_1 | S1_1 | C1_1  | C5_1               | -71.99(16)  |
| C6_1 | S2_1 | C7_1  | S3_1               | -179.07(12) |
| C6_1 | S2_1 | C7_1  | N1_1               | -0.32(15)   |
| C7_1 | S2_1 | C6_1  | S1_1               | 178.20(12)  |
| C7_1 | S2_1 | C6_1  | N2_1               | 0.17(15)    |
| C7_1 | S3_1 | C8_1  | C9_1               | -177.42(12) |
| C7_1 | N1_1 | N2_1  | C6_1               | -0.2(2)     |
| C8_1 | S3_1 | C7_1  | S2_1               | 176.30(11)  |
| C8_1 | S3_1 | C7_1  | N1_1               | -2.32(19)   |
| C8_1 | C9_1 | C10_1 | C10_1 <sup>1</sup> | 179.55(18)  |

<sup>1</sup>1-X,-Y,2-Z

**Table 5.** Hydrogen Atom Coordinates ( $\text{\AA}\times 10^4$ ) and Isotropic Displacement Parameters ( $\text{\AA}^2\times 10^3$ ) of 1,6-bis(2-cyclopentylsulfenyl-1,3,4-thiadiazole-5-sulfenyl) hexane.

| Atom   | x        | y       | z       | U(eq) |
|--------|----------|---------|---------|-------|
| H1_1   | 7934.91  | 2169.65 | 3694.28 | 56    |
| H2A_1  | 9259.08  | 3577.48 | 4897.55 | 81    |
| H2B_1  | 8790.29  | 1226.03 | 5017.36 | 81    |
| H3A_1  | 9511.8   | -629.45 | 3923.81 | 91    |
| H3B_1  | 10017.22 | 1662.02 | 3875.37 | 91    |
| H4A_1  | 9595.2   | 1788.24 | 2163.89 | 84    |
| H4B_1  | 8891.94  | 158.31  | 2360.08 | 84    |
| H5A_1  | 8304.3   | 3697.18 | 2108.69 | 69    |
| H5B_1  | 8991.99  | 5100.9  | 2683.6  | 69    |
| H8A_1  | 5681.98  | 1778.53 | 7614.68 | 54    |
| H8B_1  | 6404.5   | 1497.16 | 8412.81 | 54    |
| H9A_1  | 5718.26  | 3312.19 | 9784.68 | 57    |
| H9B_1  | 4993.23  | 3377.12 | 8985.67 | 57    |
| H10A_1 | 5712.53  | -851.48 | 9712.92 | 54    |
| H10B_1 | 4984.85  | -778.32 | 8922.28 | 54    |

## Experimental

Single crystals of 1,6-bis(2-cyclopentylsulfenyl-1,3,4-thiadiazole-5-sulfenyl) hexane ( $\text{C}_{20}\text{H}_{30}\text{N}_4\text{S}_6$ ) were isolated through recrystallization from ethyl acetate at room temperature. A suitable crystal was selected and mounted on the Mitegen Dual-Thickness Micromount loop. The experimental data were collected using a Bruker D8 Quest Photon III HPAD Diffractometer. The crystal was kept at 303(2) K during data collection. Using ShelXle Qt6 [1], the structure was solved using the direct method in SHELXS software [2] and refined with the SHELX refinement software [2] integrated in the graphical ShelXle software.

### Crystal structure determination of 1,6-bis(2-cyclopentylsulfenyl-1,3,4-thiadiazole-5-sulfenyl) hexane

**Crystal Data** for  $\text{C}_{10}\text{H}_{15}\text{N}_2\text{S}_3$  ( $M=259.42$  g/mol): monoclinic, space group  $P2_1/c$  (no. 14),  $a = 17.644(6)$   $\text{\AA}$ ,  $b = 5.6480(18)$   $\text{\AA}$ ,  $c = 12.488(4)$   $\text{\AA}$ ,  $\beta = 93.834(12)^\circ$ ,  $V = 1241.7(7)$   $\text{\AA}^3$ ,  $Z = 4$ ,  $T = 303(2)$  K,  $\mu(\text{MoK}\alpha) = 0.567$   $\text{mm}^{-1}$ ,  $D_{\text{calc}} = 1.388$   $\text{g/cm}^3$ , 35642 reflections measured ( $6.54^\circ \leq 2\theta \leq 55.158^\circ$ ), 2867 unique ( $R_{\text{int}} = 0.0570$ ,  $R_{\text{sigma}} = 0.0265$ ) which were used in all calculations. The final  $R_1$  was 0.0347 ( $I > 2\sigma(I)$ ), and  $wR_2$  was 0.0913 (all data).

### Refinement model description

Number of restraints - 0, number of constraints - unknown.

Details:

<sup>1.a</sup> Ternary CH refined with riding coordinates:

C1(H1)

<sup>1,b</sup> Secondary CH2 refined with riding coordinates:

C2(H2A,H2B), C3(H3A,H3B), C4(H4A,H4B), C5(H5A,H5B), C8(H8A,H8B), C9(H9A,H9B),

C10(H10A,H10B)

This report has been created with Olex2, compiled on 2020.11.12 svn.r5f609507 for OlexSys. Please [let us know](#) if there are any errors or if you would like to have additional features.

## Reference

- [1] C.B. Hübschle, G.M. Sheldrick, B. Dittrich, ShelXle: a Qt graphical user interface for SHELXL, *J. Appl. Cryst.*, 2011, 44, 1281-1284.  
<https://doi.org/10.1107/S0021889811043202>
- [2] G.M. Sheldrick, A short history of SHELX. *Acta Crystallogr., Sect. A: Found. Crystallogr.* 2008, 64(1), 112-122.  
<https://doi.org/10.1107/S0108767307043930>
