# Supplementary material
Source: Royal Society of Chemistry journal article supplement (doi:10.1039/d6ob00750c)
Supplement: d6ob00750c3.xlsx [file d6ob00750c3.xlsx]

## Sheet: Toxicity 
Prediction of Toxicity of chemicals		Cefazolin		Gentamicin		C5C4TD		C5C6TD		C6C4TD		C6C6TD
Classification	Target	Pred.	Prob.	Pred.	Prob.	Pred.	Prob.	Pred.	Prob.	Pred.	Prob.	Pred.	Prob.
Organ toxicity	Hepatotoxicity	Inactive	0.51	Inactive	0.83	Inactive	0.5	Inactive	0.52	Inactive	0.51	Inactive	0.51
	Neurotoxicity	Inactive	0.67	Active	0.55	Inactive	0.56	Inactive	0.55	Inactive	0.52	Inactive	0.52
	Nephrotoxicity	Active	0.6	Active	0.88	Inactive	0.74	Inactive	0.74	Inactive	0.76	Inactive	0.76
	Respiratory toxicity	Active	0.94	Active	0.92	Inactive	0.56	Inactive	0.55	Inactive	0.52	Inactive	0.52
	Cardiotoxicity	Inactive	0.79	Active	0.52	Inactive	0.84	Inactive	0.83	Inactive	0.86	Inactive	0.86
Toxicity end points	Carcinogenicity	Inactive	0.53	Inactive	0.74	Active	0.5	Active	0.5	Inactive	0.56	Inactive	0.56
	Immunotoxicity	Inactive	0.99	Active	0.76	Inactive	0.99	Inactive	0.99	Inactive	0.99	Inactive	0.99
	Mutagenicity	Inactive	0.54	Inactive	0.77	Inactive	0.51	Inactive	0.51	Inactive	0.51	Inactive	0.51
	Cytotoxicity	Inactive	0.65	Inactive	0.66	Inactive	0.78	Inactive	0.78	Inactive	0.81	Inactive	0.81
	BBB-barrier	Inactive	1	Inactive	0.99	Active	0.85	Active	0.87	Active	0.86	Active	0.86
	Ecotoxicity	Inactive	0.67	Inactive	0.53	Active	0.7	Active	0.7	Active	0.73	Active	0.73
	Clinical toxicity	Active	0.54	Active	0.51	Inactive	0.6	Inactive	0.6	Inactive	0.56	Inactive	0.56
	Nutritional toxicity	Inactive	0.53	Inactive	0.6	Inactive	0.7	Inactive	0.71	Inactive	0.71	Inactive	0.71
Tox21-Nuclear receptor signalling pathways	Aryl hydrocarbon Receptor (AhR)	Inactive	0.98	Inactive	0.98	Inactive	0.58	Inactive	0.59	Inactive	0.63	Inactive	0.63
	Androgen Receptor (AR)	Inactive	0.99	Inactive	0.81	Inactive	0.95	Inactive	0.96	Inactive	0.95	Inactive	0.95
	Androgen Receptor Ligand Binding Domain (AR-LBD)	Inactive	0.99	Inactive	0.96	Inactive	0.92	Inactive	0.93	Inactive	0.96	Inactive	0.96
	Aromatase	Inactive	0.99	Inactive	0.93	Inactive	0.9	Inactive	0.91	Inactive	0.82	Inactive	0.82
	Estrogen Receptor Alpha (ER)	Inactive	0.97	Inactive	0.69	Inactive	0.8	Inactive	0.81	Inactive	0.79	Inactive	0.79
	Estrogen Receptor Ligand Binding Domain (ER-LBD)	Inactive	0.99	Inactive	0.91	Inactive	0.98	Inactive	0.97	Inactive	0.97	Inactive	0.97
	Peroxisome Proliferator Activated Receptor Gamma (PPAR-Gamma)	Inactive	0.99	Inactive	0.99	Inactive	0.78	Inactive	0.78	Inactive	0.82	Inactive	0.82
Tox21-Stress response pathways	Nuclear factor (erythroid-derived 2)-like 2/antioxidant responsive element (nrf2/ARE)	Inactive	0.93	Inactive	0.98	Inactive	0.63	Inactive	0.63	Inactive	0.62	Inactive	0.62
	Heat shock factor response element (HSE)	Inactive	0.93	Inactive	0.98	Inactive	0.63	Inactive	0.63	Inactive	0.62	Inactive	0.62
	Mitochondrial Membrane Potential (MMP)	Inactive	0.98	Inactive	0.84	Inactive	0.71	Inactive	0.71	Inactive	0.64	Inactive	0.64
	Phosphoprotein (Tumor Supressor) p53	Inactive	0.99	Inactive	0.93	Inactive	0.88	Inactive	0.88	Inactive	0.92	Inactive	0.92
	ATPase family AAA domain-containing protein 5 (ATAD5)	Inactive	0.99	Inactive	0.91	Inactive	0.86	Inactive	0.88	Inactive	0.86	Inactive	0.86
Molecular Initiating Events	Thyroid hormone receptor alpha (THRα)	Inactive	0.89	Inactive	0.9	Inactive	0.96	Inactive	0.95	Inactive	0.94	Inactive	0.94
	Thyroid hormone receptor beta (THRβ)	Inactive	0.73	Inactive	0.78	Inactive	0.81	Inactive	0.81	Inactive	0.79	Inactive	0.79
	Transtyretrin (TTR)	Inactive	0.76	Inactive	0.97	Inactive	0.58	Inactive	0.64	Inactive	0.64	Inactive	0.64
	Ryanodine receptor (RYR)	Inactive	0.71	Inactive	0.98	Inactive	0.79	Inactive	0.78	Inactive	0.78	Inactive	0.78
	GABA receptor (GABAR)	Inactive	0.83	Inactive	0.96	Inactive	0.9	Inactive	0.89	Inactive	0.89	Inactive	0.89
	Glutamate N-methyl-D-aspartate receptor (NMDAR)	Inactive	0.94	Inactive	0.92	Inactive	0.96	Inactive	0.97	Inactive	0.97	Inactive	0.97
	alpha-amino-3-hydroxy-5-methyl-4-isoxazolepropionate receptor (AMPAR)	Inactive	0.82	Inactive	0.97	Inactive	0.99	Inactive	0.99	Inactive	0.99	Inactive	0.99
	Kainate receptor (KAR)	Inactive	0.97	Inactive	0.99	Inactive	0.99	Inactive	0.99	Inactive	1	Inactive	1
	Achetylcholinesterase (AChE)	Inactive	0.87	Inactive	0.83	Inactive	0.71	Inactive	0.66	Inactive	0.66	Inactive	0.66
	Constitutive androstane receptor (CAR)	Inactive	1	Inactive	0.98	Inactive	0.99	Inactive	0.99	Inactive	0.99	Inactive	0.99
	Pregnane X receptor (PXR)	Active	0.5	Inactive	0.92	Inactive	0.65	Inactive	0.65	Inactive	0.65	Inactive	0.65
	NADH-quinone oxidoreductase (NADHOX)	Inactive	0.93	Inactive	0.97	Inactive	0.82	Inactive	0.77	Inactive	0.84	Inactive	0.84
	Voltage gated sodium channel (VGSC)	Inactive	0.76	Inactive	0.95	Inactive	0.65	Inactive	0.67	Inactive	0.64	Inactive	0.64
	Na+/I- symporter (NIS)	Inactive	0.54	Inactive	0.98	Inactive	0.86	Inactive	0.87	Inactive	0.86	Inactive	0.86
Metabolism	Cytochrome CYP1A2	Inactive	0.99	Inactive	0.99	Inactive	0.63	Inactive	0.64	Inactive	0.58	Inactive	0.58
	Cytochrome CYP2C19	Inactive	0.98	Inactive	0.98	Inactive	0.69	Inactive	0.69	Inactive	0.65	Inactive	0.65
	Cytochrome CYP2C9	Inactive	0.65	Inactive	0.92	Active	0.56	Active	0.55	Active	0.66	Active	0.66
	Cytochrome CYP2D6	Inactive	0.89	Inactive	0.81	Inactive	0.62	Inactive	0.61	Inactive	0.56	Inactive	0.56
	Cytochrome CYP3A4	Inactive	0.99	Inactive	0.99	Inactive	0.78	Inactive	0.77	Inactive	0.64	Inactive	0.64
	Cytochrome CYP2E1	Inactive	0.99	Inactive	0.99	Inactive	0.61	Inactive	0.63	Inactive	0.69	Inactive	0.69

## Sheet: Pharmacokinetic properties 
Pharmacokinetic properties	Compound
	Cefazolin	Gentamicin	C5C4TD	C5C6TD	C6C4TD	C6C6TD
Predicted LD50 (mg/kg)	11000	5000	1000	10000	1000	10000
Predicted Toxicity Class	6	5	4	6	4	6
Molecular weight (g/mol)	454.51	477.6	490.82	518.87	518.87	546.92
Number of hydrogenbond acceptors	13	12	8	8	8	8
Number of hydrogenbond donors	2	8	0	0	0	0
Number of atoms	29	33	28	30	30	32
Number of bonds	32	35	31	33	33	35
Number of rotablebonds	8	7	11	13	11	13
Molecular refractivity	106.69	118.31	128.43	138.04	138.04	147.66
Topological Polar Surface Area (TPSA) (Å2)	234.93	199.73	209.24	209.24	209.24	209.24
ABS (%)	27.9492	40.0932	36.8122	36.8122	36.8122	36.8122
Octanol/water partitioncoefficient (log Po/w)	-0.31	-0.44	7.12	7.9	7.9	8.68
